# Supplementary figures and images for: [Retracted] Rocaglamide Prolonged Allograft Survival by Inhibiting Differentiation of Th1/Th17 Cells in Cardiac Transplantation
Source: Hindawi journal article supplement (doi:10.1155/2022/2048095), 2022-01-01

# Supplemental Figure 1. Rocaglamide Decreased the Expression of AP-1

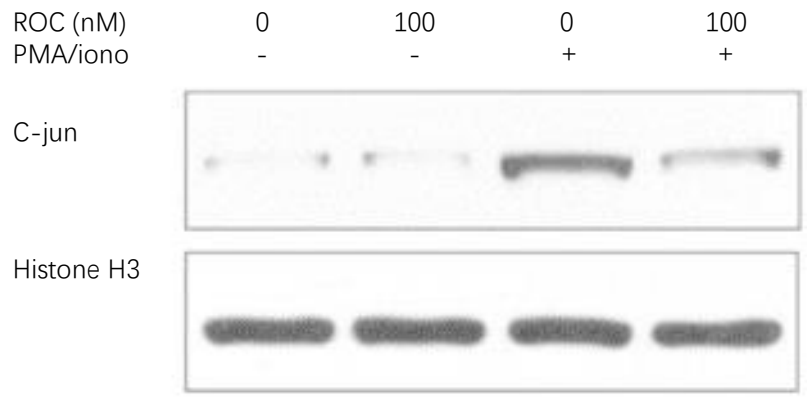

Supplement: f1 [file 2048095.f1.pdf]

## Supplemental Figure 2. Rocaglamide Had No Effect on Apoptosis in the Activated Condition

A

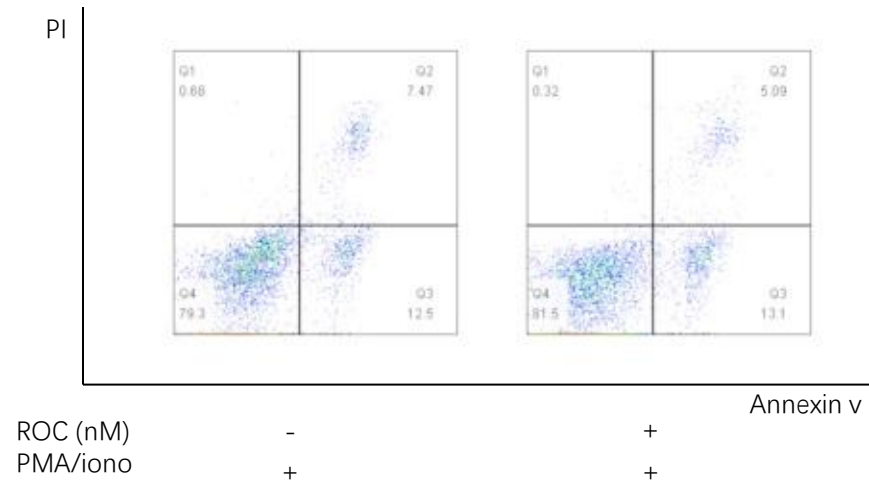

B

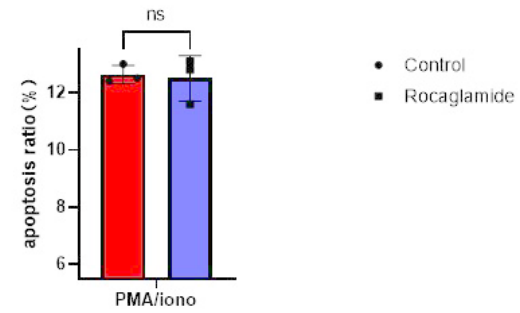

Supplement: f2 [file 2048095.f2.pdf]

# Supplemental Figure 3. Rocaglamide Had No Effect on B cells in the Recipients.

A

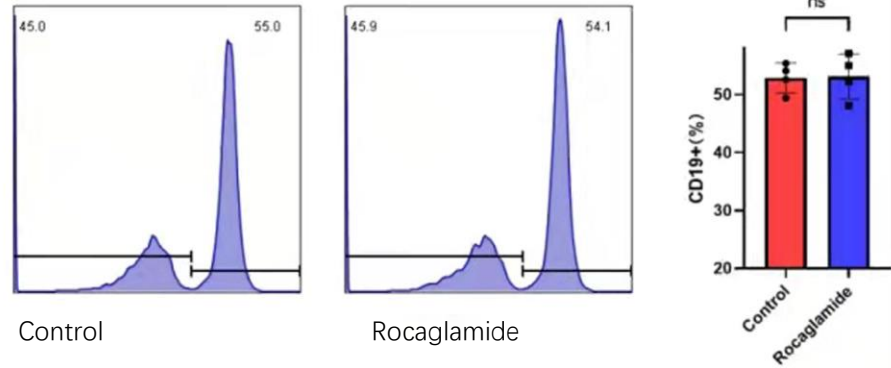

CD19+

B

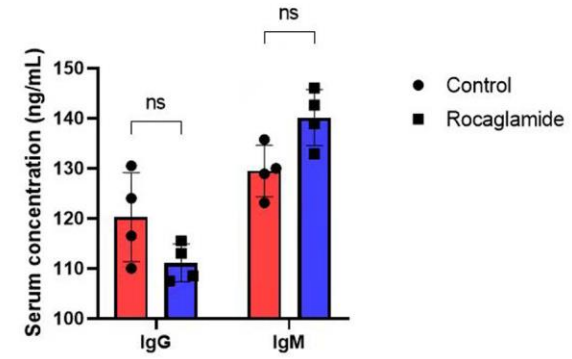

Supplement: f3 [file 2048095.f3.pdf]
